# Supplementary material for: Ag/polyaniline heterostructured nanosheets loaded with g-C3N4 nanoparticles for highly efficient photocatalytic hydrogen generation under visible light
Source: Royal Society of Chemistry journal article supplement (doi:10.1039/c7nj01903c), 2017-01-01
Supplement: c7nj01903c1.pdf [file c7nj01903c1.pdf]

## Supporting Information

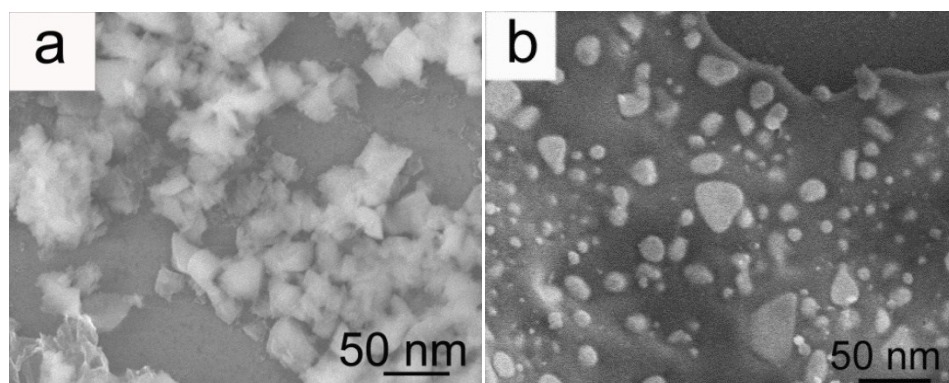

**Fig. S1.** SEM images of g-C<sub>3</sub>N<sub>4</sub> NPs (a) and Ag/g-C<sub>3</sub>N<sub>4</sub>/PANI (b).

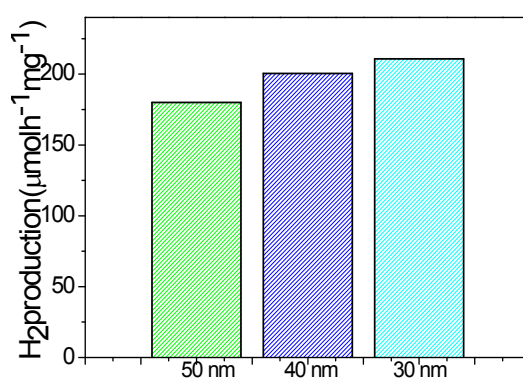

**Fig. S2.** Photocatalytic production of H<sub>2</sub> obtained from g-C<sub>3</sub>N<sub>4</sub>-Ag/PANI nanocomposites with different size g-C<sub>3</sub>N<sub>4</sub> NPs.

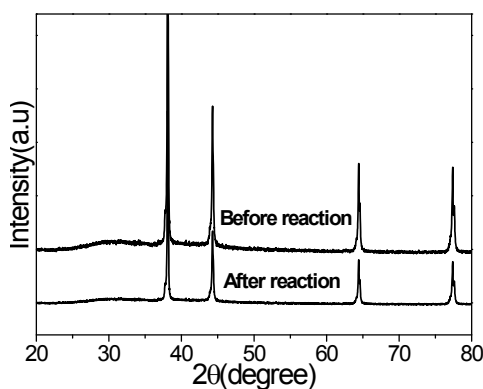

**Fig. S3.** XRD patterns of before and after catalytic reaction g-C<sub>3</sub>N<sub>4</sub>-Ag/PANI nanocomposites.
